# Supplementary material
Source: PubMed Central journal article supplement (PMC3929253)
Supplement: Supp_Table1.pdf [file Supp_Table1.pdf]

## Supplementary Data

SUPPLEMENTARY TABLE S1. BRAIN REGIONS  
SHOWING SIGNIFICANT CORRELATION BETWEEN HEAD  
MOTION AND SPECTRAL POWER ( $N=1000$ )  
WITHOUT GLOBAL SIGNAL REGRESSION

|                                | L/R | Size<br>(voxel) | MNI<br>coordinates |     |     | Peak<br>z-stat |
|--------------------------------|-----|-----------------|--------------------|-----|-----|----------------|
|                                |     |                 | x                  | y   | z   |                |
| Low frequency (0.007–0.05 Hz)  |     |                 |                    |     |     |                |
| S1/M1                          | R   | 558             | 54                 | -20 | 8   | 6.15           |
|                                | R   | 680             | 56                 | -16 | 40  | 5.04           |
|                                | L   | 576             | -52                | -16 | 0   | 5.27           |
| MCC                            | R   | 729             | 2                  | 0   | 50  | 5.39           |
| Insula                         | R   | 710             | 36                 | -16 | -2  | 5.88           |
|                                | L   | 966             | -30                | -20 | -2  | 6.21           |
| MPFC                           | R   | 394             | 8                  | 50  | -24 | -5.21          |
| HF                             | R   | 357             | 26                 | -12 | -18 | -7.39          |
|                                | L   | 316             | -30                | -18 | -18 | -6.56          |
| LTC                            | R   | 586             | 48                 | -32 | -24 | -5.81          |
|                                | L   | 272             | -46                | -34 | -22 | -5.83          |
| IPL                            | L   | 301             | -46                | -64 | 50  | -5.94          |
|                                | R   | 96              | 42                 | -70 | 48  | -4.38          |
| Orbitofrontal cortex           | R   | 260             | 14                 | 24  | -20 | -5.61          |
|                                | L   | 437             | -18                | 26  | -20 | -6.79          |
| Mid frequency (0.05–0.12 Hz)   |     |                 |                    |     |     |                |
| S1/M1                          | R   | 1277            | 52                 | -22 | 54  | -4.55          |
| LTC                            | R   | 361             | 62                 | -8  | -6  | -4.94          |
|                                | L   | 159             | -64                | -22 | 4   | -4.10          |
| Cingulate cortex               | R   | 157             | 4                  | 28  | 22  | -3.29          |
| MT+                            | R   | 361             | 48                 | -68 | 14  | -6.01          |
|                                | L   | 121             | -50                | -72 | 12  | -4.54          |
| Cuneus                         | L   | 592             | -2                 | -82 | -16 | -4.88          |
| High frequency (0.12–0.167 Hz) |     |                 |                    |     |     |                |
| MPFC                           | —   | 1912            | 0                  | 60  | 12  | 6.52           |
| PCC/precuneus                  | R   | 771             | 4                  | -64 | 38  | 5.68           |
| IPL                            | L   | 592             | -36                | -80 | 40  | 5.81           |
|                                | R   | 378             | 40                 | -74 | 44  | 5.18           |
| LTC                            | L   | 119             | -36                | 22  | -26 | 3.90           |
| HF                             | R   | 104             | 26                 | -12 | -18 | 4.65           |
|                                | L   | 224             | -28                | -16 | -18 | 5.36           |
| Orbitofrontal cortex           | R   | 313             | 20                 | 30  | -20 | 6.19           |
|                                | L   | 638             | -20                | 28  | -18 | 7.62           |
| dlPFC                          | L   | 364             | -30                | 62  | 4   | 5.25           |
|                                | R   | 525             | 12                 | 66  | 16  | 5.91           |
| Cuneus                         | L   | 248             | -12                | -84 | 46  | 4.81           |
| Insula                         | R   | 261             | 32                 | -22 | 8   | -4.18          |
|                                | L   | 429             | -34                | -34 | 14  | -4.97          |

GSR, global signal regression; S1/M, pre- and postcentral cortex; MCC, mid-cingulate cortex; MPFC, medial prefrontal cortex; PCC, posterior cingulate cortex; IPL, inferior parietal lobule; LTC, lateral temporal cortex; HF, hippocampal formation; dlPFC, dorsolateral prefrontal cortex; MT+, visual area MT (middle temporal).
