# Supplementary material
Source: PubMed Central journal article supplement (PMC3929253)
Supplement: Supp_Table2.pdf [file Supp_Table2.pdf]

SUPPLEMENTARY TABLE S2. BRAIN REGIONS SHOWING  
SIGNIFICANT CORRELATION BETWEEN HEAD  
MOTION AND SPECTRAL POWER ( $N=1000$ )  
WITH GLOBAL SIGNAL REGRESSION

|                                | L/R | Size<br>(voxel) | MNI<br>coordinates |     |     | Peak<br>z-stat |
|--------------------------------|-----|-----------------|--------------------|-----|-----|----------------|
|                                |     |                 | x                  | y   | z   |                |
| Low frequency (0.007–0.05 Hz)  |     |                 |                    |     |     |                |
| MPFC                           | L   | 1664            | -2                 | 60  | -6  | -6.09          |
| MPFC (ventromedial)            | —   | 447             | 0                  | 52  | -22 | -5.09          |
| Precuneus                      | L   | 260             | -10                | -68 | 34  | -5.10          |
|                                | R   | 161             | 10                 | -66 | 44  | -4.70          |
| PCC                            | R   | 78              | 8                  | -46 | 4   | -3.84          |
| LTC                            | R   | 1391            | 44                 | -30 | -24 | -7.83          |
|                                | L   | 751             | -44                | -34 | -22 | -7.72          |
| IPL                            | R   | 535             | 52                 | -40 | 56  | -5.96          |
|                                | L   | 112             | -32                | -46 | 38  | -4.09          |
| Superior parietal lobule       | L   | 567             | -30                | -72 | 54  | -6.19          |
|                                | R   | 576             | 26                 | -14 | -18 | -7.48          |
| HF                             | L   | 535             | -28                | -16 | -18 | -6.87          |
|                                | R   | 169             | 48                 | 36  | 26  | -4.82          |
| dlPFC                          | R   | 471             | 20                 | 64  | 22  | -5.30          |
|                                | L   | 211             | -36                | 56  | 14  | -4.80          |
| L                              | L   | 301             | -42                | 46  | -12 | -4.79          |
|                                | L   | 69              | -6                 | 14  | 38  | -3.65          |
| MCC                            | L   | 69              | -6                 | 14  | 38  | -3.65          |
| Orbitofrontal cortex           | L   | 465             | -18                | 26  | -20 | -7.22          |
|                                | R   | 417             | 14                 | 24  | -20 | -6.12          |
| Cuneus                         | L   | 154             | -10                | -90 | 38  | -4.89          |
| Mid frequency (0.05–0.12 Hz)   |     |                 |                    |     |     |                |
| No significant voxels          |     |                 |                    |     |     |                |
| High frequency (0.12–0.167 Hz) |     |                 |                    |     |     |                |
| MPFC                           | —   | 2363            | 0                  | 54  | -4  | 7.23           |
| PCC                            | R   | 1981            | 2                  | -62 | 38  | 6.76           |
| LTC                            | R   | 255             | 62                 | -56 | -12 | 4.50           |
|                                | L   | 171             | -44                | -36 | -22 | 4.03           |
| IPL                            | R   | 183             | 50                 | -60 | 26  | 4.43           |
|                                | R   | 181             | 58                 | -34 | 38  | 4.16           |
| L                              | L   | 217             | -40                | -74 | 32  | 5.38           |
|                                | L   | 182             | -28                | -16 | -18 | 4.59           |
| HF                             | R   | 55              | 26                 | -12 | -18 | 3.87           |
|                                | R   | 774             | 28                 | 60  | 14  | 5.44           |
| dlPFC                          | L   | 180             | -44                | 42  | 16  | 4.66           |
|                                | L   | 153             | -42                | 42  | 28  | 4.29           |
| Orbitofrontal cortex           | R   | 384             | 22                 | 30  | -20 | 6.13           |
|                                | L   | 450             | -20                | 30  | -18 | 6.70           |
| Cuneus                         | —   | 156             | 0                  | -88 | 12  | 3.86           |
