# Supplementary material
Source: PubMed Central journal article supplement (PMC3929253)
Supplement: Supp_Table3.pdf [file Supp_Table3.pdf]

SUPPLEMENTARY TABLE S3. BRAIN REGIONS SHOWING  
SIGNIFICANT DIFFERENCES IN SPECTRAL POWER  
BETWEEN THE HIGH- ( $N=100$ ) AND LOW-MOTION  
( $N=100$ ) GROUPS WITHOUT GLOBAL SIGNAL REGRESSION

|                                | L/R | Size<br>( <i>voxel</i> ) | MNI<br><i>coordinates</i> |          |          | Peak<br><i>z-stat</i> |
|--------------------------------|-----|--------------------------|---------------------------|----------|----------|-----------------------|
|                                |     |                          | <i>x</i>                  | <i>y</i> | <i>z</i> |                       |
| Low frequency (0.007–0.05 Hz)  |     |                          |                           |          |          |                       |
| S1/M1                          | R   | 130                      | 54                        | -18      | 8        | 5.34                  |
| MCC                            | R   | 77                       | 6                         | -6       | 46       | 4.43                  |
| Insula                         | L   | 246                      | -34                       | -20      | -2       | 5.57                  |
|                                | R   | 255                      | 38                        | -14      | -4       | 5.53                  |
| MPFC                           | L   | 613                      | -4                        | 58       | -4       | -5.42                 |
| PCC                            | L   | 81                       | -2                        | -58      | 24       | -3.80                 |
| LTC                            | R   | 563                      | 44                        | -30      | -26      | -6.12                 |
|                                | R   | 101                      | 64                        | -4       | -18      | -4.93                 |
|                                | L   | 263                      | -46                       | -32      | -24      | -5.81                 |
| HF                             | R   | 222                      | 28                        | -14      | -18      | -6.55                 |
|                                | L   | 265                      | -32                       | -28      | -14      | -6.21                 |
| Orbitofrontal cortex           | R   | 234                      | 14                        | 24       | -20      | -6.55                 |
|                                | L   | 379                      | -14                       | 22       | -20      | -6.75                 |
| Mid frequency (0.05–0.12 Hz)   |     |                          |                           |          |          |                       |
| S1/M1                          | L   | 197                      | -46                       | -34      | 60       | -4.52                 |
|                                | R   | 69                       | 48                        | -24      | 46       | -3.74                 |
| LTC                            | R   | 114                      | 68                        | -18      | 4        | -4.78                 |
|                                | L   | 85                       | -58                       | -48      | -16      | -4.07                 |
| HF                             | L   | 58                       | -22                       | -16      | -14      | -4.68                 |
| MT+                            | R   | 109                      | 50                        | -68      | 12       | -5.14                 |
| Cuneus                         | L   | 113                      | -2                        | -82      | -14      | -4.43                 |
| High frequency (0.12–0.167 Hz) |     |                          |                           |          |          |                       |
| MPFC                           | L   | 1360                     | -2                        | 56       | 4        | 6.02                  |
| Precunes                       | —   | 281                      | 0                         | -74      | 50       | 4.93                  |
| PCC                            | —   | 344                      | 0                         | -60      | 24       | 4.88                  |
| IPL                            | L   | 254                      | -34                       | -80      | 42       | 5.24                  |
|                                | R   | 182                      | 40                        | -76      | 42       | 4.66                  |
| HF                             | R   | 129                      | 28                        | -14      | -18      | 3.89                  |
|                                | L   | 136                      | -26                       | -16      | -18      | 4.87                  |
| dIPFC                          | R   | 369                      | 22                        | 64       | 0        | 4.40                  |
|                                | L   | 132                      | -44                       | 28       | 24       | 3.66                  |
|                                | L   | 292                      | -18                       | 64       | 6        | 5.33                  |
| Orbitofrontal cortex           | R   | 241                      | 20                        | 30       | -20      | 5.36                  |
|                                | L   | 317                      | -18                       | 28       | -20      | 6.60                  |
| Insula                         | L   | 184                      | -32                       | -20      | -2       | -4.55                 |
|                                | L   | 429                      | -34                       | -34      | 14       | -4.97                 |
