# Supplementary material
Source: PubMed Central journal article supplement (PMC3929253)
Supplement: Supp_Table4.pdf [file Supp_Table4.pdf]

SUPPLEMENTARY TABLE S4. BRAIN REGIONS SHOWING  
SIGNIFICANT DIFFERENCES IN SPECTRAL POWER  
BETWEEN THE HIGH- ( $N=100$ ) AND LOW-MOTION  
( $N=100$ ) GROUPS WITH GLOBAL SIGNAL REGRESSION

|                                | L/R | Size<br>( <i>voxel</i> ) | MNI<br><i>coordinates</i> |          |          | Peak<br><i>z-stat</i> |
|--------------------------------|-----|--------------------------|---------------------------|----------|----------|-----------------------|
|                                |     |                          | <i>x</i>                  | <i>y</i> | <i>z</i> |                       |
| Low frequency (0.007–0.05 Hz)  |     |                          |                           |          |          |                       |
| MPFC                           | L   | 1298                     | -2                        | 58       | -4       | -6.34                 |
| Precuneus                      | —   | 347                      | 0                         | -72      | 50       | -4.89                 |
| IPL                            | R   | 165                      | 52                        | -42      | 56       | -5.14                 |
|                                | L   | 127                      | -50                       | -48      | 54       | -4.34                 |
| LTC                            | R   | 722                      | 48                        | -34      | -22      | -6.93                 |
|                                | R   | 158                      | 62                        | -24      | -28      | -5.84                 |
|                                | L   | 60                       | -60                       | -34      | -20      | -5.25                 |
| HF                             | R   | 275                      | 16                        | -4       | -20      | -5.68                 |
|                                | L   | 210                      | -20                       | 0        | -22      | -5.06                 |
| Superior parietal lobule       | R   | 257                      | 34                        | -70      | 54       | -5.21                 |
|                                | L   | 369                      | -30                       | -72      | 54       | -5.71                 |
| Orbitofrontal cortex           | R   | 377                      | 14                        | 24       | -20      | -6.54                 |
|                                | L   | 365                      | -14                       | 22       | -20      | -6.78                 |
| dIPFC                          | R   | 281                      | 30                        | 48       | 38       | -5.61                 |
|                                | L   | 359                      | -36                       | 56       | 12       | -5.24                 |
|                                | L   | 152                      | -34                       | 58       | 12       | -5.18                 |
| MCC                            | —   | 61                       | 0                         | 14       | 30       | -3.79                 |
| Mid frequency (0.05–0.12 Hz)   |     |                          |                           |          |          |                       |
| No significant voxels          |     |                          |                           |          |          |                       |
| High frequency (0.12–0.167 Hz) |     |                          |                           |          |          |                       |
| MPFC                           | L   | 1369                     | -2                        | 56       | 2        | 6.23                  |
| PCC                            | —   | 312                      | 0                         | -46      | 24       | 3.89                  |
| Precuneus                      | —   | 746                      | 0                         | -74      | 50       | 5.87                  |
| IPL                            | R   | 71                       | 48                        | -54      | 54       | 4.14                  |
|                                | L   | 93                       | -26                       | -52      | 70       | 4.45                  |
| LTC                            | R   | 28                       | 60                        | -48      | -10      | 3.30                  |
| HF                             | R   | 80                       | 26                        | -12      | -18      | 3.59                  |
|                                | L   | 43                       | -20                       | -2       | -22      | 3.57                  |
| Orbitofrontal cortex           | R   | 302                      | 20                        | 30       | -20      | 5.18                  |
|                                | L   | 275                      | -18                       | 28       | -20      | 5.63                  |
| dIPFC                          | R   | 489                      | 30                        | 60       | 14       | 4.70                  |
|                                | L   | 265                      | -44                       | 28       | 24       | 4.22                  |
|                                | L   | 360                      | -20                       | 64       | 8        | 5.14                  |
